## A self-report tool for identification of individuals with coronary atherosclerosis - The Swedish CARDioPulmonary BioImage Study

Göran Bergström<sup>\*a, b</sup>, Eva Hagberg<sup>\*a</sup>, Elias Björnson<sup>a</sup>, Martin Adiels<sup>c</sup>, Carl Bonander<sup>c, d</sup>, Ulf Strömberg<sup>e, c</sup>, Jonas Andersson<sup>f</sup>, Mattias Brunström<sup>f</sup>, Carl-Johan Carlhäll<sup>g, h</sup>, Gunnar Engström<sup>i</sup>, David Erlinge<sup>j</sup>, Isabel Goncalves<sup>k, l</sup>, Anders Gummesson<sup>a, m</sup>, Emil Hagström<sup>n, o</sup>, Ola Hjelmgren<sup>a, b</sup>, Stefan James<sup>n, o</sup>, Magnus Janzon<sup>p</sup>, Lena Jonasson<sup>s</sup>, Lars Lind<sup>f</sup>, Martin Magnusson<sup>i, k, s, t</sup>, Viktor Oskarsson<sup>f, u</sup>, Johan Sundström<sup>v, w</sup>, Per Svensson<sup>x, y</sup>, Stefan Söderberg<sup>f</sup>, Raquel Themudo<sup>z, aa</sup>, Carl Johan Östgren<sup>g, ab</sup>, Tomas Jernberg<sup>ac</sup>

\*Authors contributed equally

<sup>a</sup>Department of Molecular and Clinical Medicine, Institute of Medicine, Sahlgrenska Academy, University of Gothenburg, Sweden

<sup>b</sup>Region Västra Götaland, Sahlgrenska University Hospital, Department of Clinical Physiology, Gothenburg.

<sup>c</sup>School of Public Health and Community Medicine, Institute of Medicine, University of Gothenburg, Gothenburg, Sweden

<sup>d</sup>Centre for Societal Risk Research, Karlstad University, Karlstad, Sweden

<sup>e</sup>Department of Research and Development, Region Halland, Halmstad, Sweden

<sup>f</sup>Department of Public Health and Clinical Medicine, Umeå University, Umeå, Sweden

<sup>g</sup>Center for Medical Image Science and Visualization (CMIV), Linköping University, Linköping, Sweden.

<sup>h</sup>Department of Clinical Physiology in Linköping, and Department of Health, Medicine and Caring Sciences, Linköping University, Linköping, Sweden

<sup>i</sup>Department of Clinical Sciences in Malmö, Lund University, Lund, Sweden

<sup>j</sup>Department of Clinical Sciences Lund, Cardiology, Lund University, and Skåne University Hospital, Sweden

<sup>k</sup>Department of Cardiology, Skåne University Hospital, Malmö, Sweden.

<sup>l</sup>Cardiovascular Research Translational Studies, Department of Clinical Sciences Malmö, Lund University, Malmö, Sweden.

<sup>m</sup>Clinical Genetics and Genomics, Sahlgrenska University Hospital, Gothenburg, Sweden

<sup>n</sup>Department of Medical Sciences, Cardiology, Uppsala University, Uppsala, Sweden

<sup>o</sup>Uppsala Clinical Research Center, Uppsala University, Uppsala, Sweden

<sup>p</sup>Department of Cardiology and Department of Health, Medicine and Caring Sciences, Unit of Cardiovascular Sciences, Linköping University, Linköping, Sweden

<sup>q</sup>Division of Cardiovascular Medicine, Department of Health, Medicine and Caring Sciences, Linköping University, Linköping, Sweden

<sup>r</sup>Department of Medical Sciences, Clinical Epidemiology, Uppsala University, Uppsala, Sweden

<sup>s</sup>North-West University, Hypertension in Africa Research Team (HART), Potchefstroom, South Africa

<sup>t</sup>Wallenberg Center for Molecular Medicine, Lund University, Sweden

<sup>u</sup>Piteå Research Unit, Region Norrbotten, Piteå, Sweden

<sup>v</sup>Department of Medical Sciences, Uppsala University, Uppsala, Sweden

<sup>w</sup>The George Institute for Global Health, University of New South Wales, Sydney, Australia

<sup>x</sup>Department of Clinical Science and Education, Södersjukhuset, Karolinska Institutet, Sweden.

<sup>y</sup>Department of Cardiology, Södersjukhuset, Sweden.

<sup>z</sup>Department of Clinical Science, Intervention and Technology, Karolinska Institute, Division of Medical Imaging and Technology, Stockholm, Sweden.

<sup>aa</sup>Department of Radiology, Karolinska University Hospital in Huddinge, Stockholm, Sweden.

<sup>ab</sup>Department of Health, Medicine and Caring Sciences, Linköping University, Linköping Sweden

<sup>ac</sup>Department of Clinical Sciences, Danderyd University Hospital, Karolinska Institutet, Stockholm, Sweden

Short title: A self-report tool for coronary atherosclerosis

Corresponding author: Dr Göran Bergström, Department of Molecular and Clinical Medicine, Institute of Medicine, Sahlgrenska Academy, Gothenburg University, Gothenburg, Sweden. Phone:+46 70 509

4405. Email: [goran.bergstrom@hjl.gu.se](mailto:goran.bergstrom@hjl.gu.se)

**NOTE: This preprint reports new research that has not been certified by peer review and should not be used to guide clinical practice.**

## Abstract

**Background:** Coronary atherosclerosis detected by imaging is a marker of elevated cardiovascular risk. However, imaging involves large resources and exposure to radiation. The aim was, therefore, to test whether non-imaging data, specifically data that can be self-reported, could be used to identify individuals with moderate to severe coronary atherosclerosis.

**Methods:** We used data from the population based Swedish CARDioPulmonary BioImage Study (SCAPIS) in individuals with coronary computed tomography angiography (CCTA, n=25,182) and coronary artery calcification score (CACS, n=28,701), aged 50-64 years without previous ischemic heart disease. We developed a risk prediction tool utilizing variables that could be assessed from home (a so-called self-report tool). For comparison, we also developed a tool utilizing variables from laboratory tests, physical examinations and self-report (a so-called clinical tool) and evaluated both models using receiver operating characteristic curve analysis, external validation, and bench-marked against factors in the Pooled Cohort Equation (PCE).

**Results:** The self-report tool (n=14 variables) and the clinical tool (n=23 variables) showed high-to-excellent discriminative ability to identify  $SIS \geq 4$  (AUC 0.79 and 0.80, respectively) and significantly better than PCE (AUC 0.76,  $p < 0.001$ ). The tools showed a larger net benefit in clinical decision making at relevant threshold probabilities. The self-report tool identified 65% of all individuals with  $SIS \geq 4$  in the top 30% of the highest-risk individuals. Tools developed for  $CACS \geq 100$  performed similarly.

**Conclusions:** We have developed a self-report tool which effectively identifies individuals with moderate to severe coronary atherosclerosis. The self-report tool may serve as pre-screening tool towards a cost-effective CT-based screening program for high-risk individuals.

**Keywords:** Self-reported data, coronary atherosclerosis, Segment Involvement Score, Coronary Artery Calcium Score, Risk prediction tool.

## **Clinical Perspective**

### What Is New?

- We have developed a self-report tool which with a good-to-excellent discriminative ability identifies individuals with moderate to severe coronary atherosclerosis.
- The self-report tool can be executed from home and has a similar performance to a clinical tool requiring a clinical visit involving blood tests and physical examination.

### What Are the Clinical Implications?

- The self-report tool could serve as an initial step towards a cost-effective screening program to identify high-risk individuals or used to identify individuals who would benefit from further risk refinement by cardiac imaging.

## Introduction

Asymptomatic individuals with signs of coronary atherosclerosis on imaging are considered to be at high risk of future ischemic heart disease (IHD).<sup>1-3</sup> A coronary artery calcification score (CACS) of  $\geq 100$ , derived from computed tomography (CT) imaging, suggests benefits of statin therapy regardless of LDL concentrations in individuals with an intermediate IHD risk, according to the pooled cohort equation (PCE) risk calculator (7.5-20.0%).<sup>1</sup> Imaging with coronary CT angiography (CCTA) holds an even bigger promise, since it also visualizes non-calcified coronary atherosclerosis, degree of stenosis, and plaque characteristics; factors that are directly related to an increased risk of future clinical events<sup>4-8</sup> and that improve risk prediction beyond clinical risk scores such as the PCE.<sup>8-10</sup> However, the drawbacks of imaging include limited availability, high costs, and risks associated with radiation and use of contrast agents. Therefore, it is of great interest to use non-imaging data to develop tools that identify individuals with high risk of coronary atherosclerosis. These tools could be directly used to identify individuals with an increased risk of IHD or to identify individuals in whom imaging could do more benefit than harm.

To facilitate participation and to reduce costs, it would be advantageous if the tools could be easily administered and based on self-reported data, not requiring a visit to a health care center. A few recent studies show promising results in the self-reported assessment of cardiovascular risk.<sup>11,12</sup>

The aim of this study was to test whether the non-imaging data collected in the Swedish CARDioPulmonary BioImage Study (SCAPIS)<sup>13,14</sup> could be used to identify individuals with moderate to severe coronary atherosclerosis (defined by the CAD-RADS criteria<sup>15</sup> as segment involvement score [SIS]  $\geq 4$  or CACS  $\geq 100$ ). These cut-off values were selected since previous work with CT<sup>2,16</sup> and CCTA<sup>7,8,17-19</sup> have consistently shown that the risk of future IHD is markedly increased at this level of coronary atherosclerosis. The more specific aim

was to test if a tool exclusively based on self-reported data could be equally effective as a tool based on the combination of self-reported data and clinical data. The tools were developed and tested in SCAPIS and externally validated in a separate cohort. We included only individuals without previous coronary heart disease and tools were bench-marked against the PCE risk calculator.

## **Methods**

### **The SCAPIS data set**

SCAPIS (n=30,154) is a population-based multicenter cohort study of randomly selected men and women aged 50 to 64 years, mainly of European ancestry.<sup>14</sup> The data collection was performed between 2014 and 2018 at six Swedish University hospitals. A comprehensive examination protocol was used, including cardiac imaging, physical examinations, routine laboratory tests, and questionnaires.<sup>13,14</sup> SCAPIS was approved by the ethics committee in Umeå, Sweden (number 2010-228-31M), all participants gave written informed consent, and the study protocols adhered to the declaration of Helsinki.

The data set used for external validation (n=1,111) was the single-site SCAPIS pilot trial collected in 2012. This study's primary objective was to provide insights into the feasibility of performing the nationwide SCAPIS and we therefore used a stratified selection of individuals aimed at low and high socioeconomic areas within the city of Gothenburg.<sup>20</sup> Participants are unique from the nationwide SCAPIS and different equipment and different staff were used.

### **Study populations**

Participants without previous coronary heart disease (myocardial infarction or coronary revascularization) and with high-quality imaging of their coronary arteries using CCTA (n=25,182) or high-quality CT imaging for CAC (n=28,701) were selected to address the

primary aim of the study (see below for imaging details). Similarly, individuals from the SCAPIS pilot trial (n=872 with CCTA and n=1,062 with CT imaging for CACS) were used for validation.

### **Cardiac image acquisition and analyses**

As previously described,<sup>14</sup> we performed cardiac CT scanning with and without contrast agent using a dedicated dual-source CT scanner equipped with a Stellar Detector (Somatom Definition Flash, Siemens Medical Solution, Forchheim, Germany). CCTA were read using the syngo.via software, and the 18-coronary segment model defined by the Society of Cardiovascular Computed Tomography was used to report coronary atherosclerosis as outlined in Supplementary Methods. SIS was calculated as the sum of all coronary artery segments with atherosclerosis.<sup>8</sup> CACS was analyzed using the method by Agatston.<sup>21</sup>

### **Factors used for developing the prediction tools**

All factors used to develop the prediction tools are summarized in Supplementary Table S1. Details on how they were collected can be found elsewhere.<sup>13,14</sup> Information on self-reported health, family history, medication, occupational and environmental exposure, lifestyle, psycho-social well-being, socio-economic status, and other social determinants was collected from questionnaires. Biochemistry analyses were analyzed from venous blood samples collected after an overnight fast. Height, weight, and hip and waist circumference were measured. Physical activity was assessed using an accelerometer. Blood pressure was measured with an automatic device (Omron M10-IT, Omron Health Care Co, Kyoto, Japan). Lung function was measured using spirometry after bronchodilatation. Variables were used in their original scale (not normalized) during model training.

## Outcomes

We used two different outcome variables:  $SIS \geq 4$  and  $CACS \geq 100$ . A detailed rationale for the selected cut-off values is presented in the Supplementary Methods. According to recent consensus by CAD-RADS,<sup>15</sup>  $SIS \geq 4$  and  $CACS \geq 100$  represent moderate to severe coronary atherosclerosis.

## Data analysis and statistics

In this study, we developed a self-report tool based on all available self-reported data.

Additionally, a clinical tool was developed, using all SCAPIS data, including self-reported data, blood tests, and physical examinations. The purpose of the clinical tool was to serve as a comparative measure to the self-report model. From the SCAPIS baseline data, we identified 105 factors as potential predictors in the self-report tool. A total of 127 factors was identified as potential predictors in the clinical tool (all factors are summarized in Supplementary Table S1). Factors in the self-report tool are possible to report without visiting a healthcare facility. The performance of both of the tools was bench-marked against the 10-year risk of atherosclerotic cardiovascular disease according to the PCE.<sup>1</sup> We also estimated the average time it took for ten co-authors to fill out the self-report tool when presented in paper format. Descriptive data are presented without imputations, while data used for the prediction tools were imputed using the K-nearest neighbor algorithm with 5 neighbors. For descriptive data, numbers, percentages, mean values (standard deviation), and median values (interquartile range) were calculated. A grid-search was employed in order to optimize model hyperparameters. We followed the TRIPOD statement for transparent reporting.<sup>22</sup> All analyses were performed using R version 4.1.3.

*Data reduction.* To identify and include the most relevant factors in our tools, we performed data reduction using a combination of data driven techniques (Boruta) and manual techniques

(described in detail in the Supplement Methods). In a sensitivity analyses, we also tested a model based on all 127 variables without prior data selection.

*Development of assessment tools for moderate to severe coronary atherosclerosis.* After the data reduction, we used XGBoost (Extreme Gradient Boosting; a decision-tree-based machine learning method) to develop the tools to identify  $SIS \geq 4$  and  $CACS \geq 100$ . The dataset was randomly split into a 75% training set and a 25% test set. The area under the receiver operating characteristic curve (AUC) was calculated and validated in the external study population and compared using the DeLong test.<sup>23</sup> We avoided overfitting by three strategies. First, hyper-parameter tuning was employed to minimize the risk of overfitting, second, we included an internal-validation subset of the data that the model had never trained on and third, we used a separate cohort as a validation cohort. Our results show that the models appear correctly trained. Calibration curves were constructed and compared between internal and external validation. We also calculated the importance ranking of each variable with XGBoost and the SHapley Additive exPlanations (SHAP)-value. SHAP values represent the relationship between each factor and the outcome for each subject, for which a higher SHAP value confers a higher assessed risk by the XGBoost algorithm.

*Methodological considerations.* Machine-learning methodology was preferred over logistic regression modelling for several reasons. First, the model can account for complex variable relationships with the outcome and interactions between variables without the need for explicit specification of this. Second, model interpretability is improved with possibility of both overall and per-subject variable importance analysis. Third, variable selection procedure is simpler and more accurate.

*Stratification for age, sex, and socio-economy.* Analyses were stratified according to sex and age (50-54, 55-59, and 60-64 years). In addition, to examine the impact of socio-economic factors, analyses were stratified by the individuals' socioeconomic status based on three



different characteristics: education (university degree or lower education), country of birth (born in Sweden or not), and the ability to raise a sum of 20,000 Swedish kronor within a week (equivalent to US\$ 1,900).

*Construction of population-ordered distributions and decision curves.* To assess our tools' performance in a potential screening situation, we constructed population-ordered distribution tables with ten groups of equal size (deciles). We also constructed clinical decision curves to evaluate if our tools gave a net benefit over the PCE at relevant threshold probabilities.<sup>24</sup>

## Results

### Study population

The study inclusion is shown in Supplementary Figure S1. In total, 25,182 individuals were included in the cohort studying  $SIS \geq 4$  as an outcome, for whom the characteristics are shown in Table 1. In total, 42.1% of the participants had coronary artery atherosclerosis and 5.1% of women and 19% of men had  $SIS \geq 4$ . In general, participants with  $SIS \geq 4$  had a more severe risk factor profile and their 10-year risk of atherosclerotic cardiovascular disease (according to the PCE) was more than 50% higher than participants with  $SIS < 4$  (1.8 times higher in women and 1.5 times in men). In total, 28,701 individuals were included in the cohort that studied  $CACS \geq 100$  as an outcome and their characteristics are shown in Supplementary Table S1. In the total population, 37.7% of the participants had positive CACS and 6.1% of women and 22.9% of men had  $CACS \geq 100$ .

In the validation cohort, a higher proportion of participants born outside Sweden and a lower proportion with university education were observed compared to the SCAPIS dataset. Details on study inclusion and characteristics of the validation cohorts are shown in Supplementary Figure S2, Supplementary Table S3, and Supplementary Table S4.

## **Factors selected for developing the self-report and clinical prediction tools**

A summary of missing data for each available factor and specification of the relevant factors identified by the Boruta algorithm is shown in Supplementary Table S1. A description of all individual factors can be found at [www.scapis.org/portal/variables](http://www.scapis.org/portal/variables). Following discussion among lead authors, the self-report tool incorporated 14 factors (Table 2). These factors included seven on demographic and anthropometric information, (sex, age, body weight at age 20, body weight, body height, waist circumference, hip circumference), two on smoking status (cigarette pack- years and smoking duration), four on existing health conditions (lipid lowering medication, antihypertensive medication, diabetes duration and diagnosed hypertension and one on family history (heredity for MI). The clinical tool incorporated 23 factors (Table 2), with all the 14 factors in the self- report model included but also adding vital signs (three factors) and laboratory measurements (six factors). Additional details on data selection can be found in the Supplementary Methods and Supplementary Results. It took 5-8 minutes to fill out the self-report questionnaire when tested on 10 co-authors.

## **Prediction tools**

The self-report tool had a high-to-excellent discriminatory capacity for  $SIS \geq 4$  in the external validation cohort (AUC 0.79, 95% CI: 0.76-0.83); and its discriminatory capacity was significantly better than the PCE risk score (AUC 0.76, 95% CI: 0.75-0.78,  $p < 0.005$ , Figure 1A). With respect to variable importance of the self-report tool, sex and age were the most important variables, followed by cigarette pack-years, lipid-lowering medication, smoking duration, and several anthropometric measures (Figure 1B). The clinical tool performed slightly better than the self-report tool (AUC 0.80, 95% CI: 0.77-0.84,  $p < 0.05$ , Figure 1C). The variable importance of the clinical tool is presented in Figure 1 D, where systolic blood

pressure and laboratory measurements of HbA1c and total cholesterol also were important for prediction. Both tools were well-calibrated (Supplementary Figure S3). SHAP plots for the interpretation of each variable's contribution to the tools are presented in Supplementary Figures S4-S5. Results for the prediction of CACS  $\geq 100$  were largely similar (Supplementary Figure S6-S9).

### **Sensitivity and stratification analyses**

In general, both prediction tools performed better in women than in men (Figure 2); and they performed better in individuals older than 55 years of age (Figure 3). Similar results were seen for CACS (Figure S10 and S11). The two tools were largely unaffected by stratification for education, country of birth, and financial resources (Supplementary Table S5 and S6). As an example, the AUC of the self-report tool was 0.79 (95% CI: 0.76-0.81) in university educated and 0.78 (95% CI: 0.76-0.78) in non-university educated. The tool that was developed based on all 127 factors had an AUC of 0.80 (95% CI: 0.78-0.81).

### **Population-ordered distribution and decision curves**

To exemplify how the prediction tools can be applied in a screening situation, we divided the population into ten groups of equal size, ordered by predicted risk (Table 3). Upon visual inspection, we identified a high-risk group in the individuals with the top 30% of assessed risk (i.e. top three deciles), with a mean absolute risk of SIS  $\geq 4$  of 27.1% for the self-report tool as indicated by red markings in Table 3. The middle four deciles suggested a moderate mean absolute risk, averaging 9,3% and marked with yellow. Additionally, a low-risk group was identified in the individuals in the bottom 30% of assessed risk, with a mean absolute risk of SIS  $\geq 4$  of 2.4%, marked green. The clinical tool showed similar patterns (Supplementary Table 7).

The remaining 40% constituted a moderate risk group, with a mean absolute risk of  $SIS \geq 4$  of 9.3% and 8.8% for the self-report and clinical tool, respectively (marked yellow in the tables). Among individuals who fell within the high-risk group, we identified 64.6% and 67.3% of all individuals with  $SIS \geq 4$  using the self-report and clinical tool, respectively. In order to find one individual with  $SIS \geq 4$  in the high-risk group, an average of 3.7 CCTAs have to be performed for the self-report tool and 3.5 CCTAs for the clinical tool. Similar results were observed for  $CACS \geq 100$  (Supplementary Table S8 and S9).

Decision curve analyses for  $SIS \geq 4$  and  $CACS \geq 100$  showed that both the self-report and the clinical tool is superior to the PCE when applied to a population with a mean absolute risk corresponding to the high-risk group (i.e. 27-28%) (Supplementary Figure S11 and S12).

## Discussion

This study shows that we can effectively use non-imaging data to identify individuals from the general population with a high likelihood of having moderate to severe coronary atherosclerosis. The discriminative ability to identify  $SIS \geq 4$  and  $CACS \geq 100$  was high-to-excellent in the external validation cohort (AUC 0.79-0.81). Most importantly, the self-report tool, based only on data that do not require a health care visit, performed almost equal to the clinical tool, which included blood tests and physical examinations.

These results suggest that screening for coronary atherosclerosis can be performed with only self-reported data and that the screening is only marginally improved by a visit to a healthcare facility. This corroborates earlier findings, in which other self-report tools for cardiovascular risk prediction have shown promising results compared to traditional clinical risk assessment

tools for the 10-year risk of cardiovascular death.<sup>11,12</sup> In addition, three main risk groups were identified in our analyses of the population ordered distribution of risk: a high-risk group, a moderate-risk group and a low-risk group. In the high-risk group (top 30% of the mean absolute risk), up to 65% of all individuals with moderate to severe coronary atherosclerosis can be identified via the self-report tool (65% of those with  $SIS \geq 4$  and 64% of those with  $CACS \geq 100$ ). In contrast, only 3-4% of all individuals with moderate to severe coronary atherosclerosis is found in the low-risk group (bottom 30% of the mean absolute risk). If our results are recalculated as the number needed to screen, a total of 3.7 CCTA examinations must be performed among high-risk individuals to detect one individual with  $SIS \geq 4$  using the self-report tool (3.5 CCTA for the clinical tool). Further, the proportion of individuals with  $SIS \geq 4$  would be around 27 to 28% in the same high-risk group. Our decision curve analysis showed that both the self-report and the clinical tool were superior to the PCE at this threshold probability. Results for CACS were similar. Implementation of a strategy that combines self-reported risk and subsequent imaging for SIS or CACS would result in the targeted identification of individuals who would benefit from improved lipid-lowering or other preventive therapies<sup>1,2</sup>. Future studies will have to test the cost-effectiveness of such a screening strategy to reduce the overall burden of cardiovascular disease.

We used a combination of data-driven and manual factor selection to optimize the performance of our tools. The strategy focused on the most easily accessible factors with the greatest impact on model performance. Not surprisingly, information on traditional risk factors<sup>1</sup>, such as sex, age, lipid-lowering medication, systolic blood pressure, anti-hypertensive medication, diabetes, and smoking status, were influential for both the self-report and the clinical tool. In addition, our data selection and variable importance emphasized the significance of continuous data such as smoking duration and cigarette pack-

years, rather than binary factors such as current smoking, yes/no. It is also noteworthy that many anthropometric measures ranked high in variable importance, confirming the importance of body weight<sup>25</sup> and abdominal obesity.<sup>26</sup> Weight at age 20, previously linked to an elevated risk of coronary atherosclerosis<sup>27</sup>, was one of the most important non-traditional factors, surpassing the impact of weight at the time of examination. On the other hand, a parent's history of myocardial infarction before age 60, ranked low in variable importance. Family history of myocardial infarction is included in some<sup>28,29</sup>, but not all<sup>1</sup>, of the previous clinical risk algorithms. We were reassured that the data reduction was successful, given that a tool that utilizing all 127 available factors achieved an AUC similar to the clinical tool. Using data from the LifeLines imaging trial (ImaLife), Ties and co-workers<sup>30</sup> tested a pre-screening strategy to identify individuals with a high probability of having CACS  $\geq 100$ . They showed that using a risk algorithm (SCORE2), primarily developed to identify the 10-year risk of developing a cardiovascular event, was not very efficient to identify individuals with CACS  $\geq 100$ . If one or more traditional risk factors were present, around 89% of all individuals with CACS  $\geq 100$  were identified; however, using that strategy, around 70% of the population had to be imaged. Our combination of self-reported risk factors into a risk assessment tool appears to be slightly more efficient, as we could identify 96% of all individuals with CACS  $\geq 100$  with the same percentage of population imaging.

## **Limitations**

A number of limitations of the current study must be acknowledged. First, all population-based studies suffer from recruitment bias, often resulting in a lower cardiovascular risk level compared to the background population. This is also true in SCAPIS<sup>20,31</sup> and, therefore, we tested whether recruitment bias could have affected the results by stratifying our sample by several socio-economic factors. However, our tools performed equally well in the different

subgroups, suggesting that recruitment bias does not affect the performance of the tools to a major extent. Second, the derivation and validation populations were mainly of northern European descent and the results may not be generalizable to other geographical regions. Third, we mainly used traditional risk factors as predictors in our tools. It is possible that non-traditional risk factors derived from further biochemical or genetic analyses could aid prediction beyond what was presented here. Fourth, our self-report tool was based on data acquired at the test sites in SCAPIS and not from home. Truly self-reported data may introduce more inaccurate measurements and lower the performance of the tools. Fifth, we chose SIS and CACS as our outcomes since they are robust and easily accessible measures of coronary atherosclerosis. In the future, we may identify other phenotypes of coronary atherosclerosis that confer a higher risk of cardiovascular disease. Sixth, our external validation relied on a pilot trial to the main study. Although using unique individuals and a fundamentally different study protocol, this may impact the generalizability of our findings to broader populations.

### **Clinical implications**

The presence of coronary atherosclerosis confers an increased risk of future myocardial infarction. Here, we present a self-report tool, trained and validated in populations without history of previous IHD, which effectively identified individuals with moderate to severe coronary atherosclerosis using self-reported data alone. Our results on the self-reported data open up for the possibility to develop cost-effective screening programs and extend previous observations on self-reported data to identify high-risk individuals for clinical IHD.<sup>11,12</sup> The self-report tool can be used on its own to identify high-risk individuals or to select individuals in need of further risk refinement via imaging. It is also possible that this tool can be effective in the communication with individuals about behavioral changes, given that sharing

of medical imaging information has been shown to affect smoking, eating, and physical activity behaviors.<sup>32</sup>

## **Conclusion**

We have developed a prediction tool based only on self-reported data that with good-to-excellent discriminative ability can identify individuals with moderate to severe coronary atherosclerosis. The tool performed equally well to a model also including clinical data generated after a clinical visit. The self-report tool could be the starting point for a screening program to identify high-risk individuals in need of imaging and further risk evaluation.

## **Acknowledgement**

We are grateful to all the participants in SCAPIS and would like to give a special thanks to all test personnel at the SCAPIS test centers around Sweden.

## **Funding**

This study received funding from: Swedish Heart-Lung Foundation, Knut and Alice Wallenberg Foundation, Swedish Research Council and VINNOVA (Sweden's Innovation agency), University of Gothenburg and Sahlgrenska University Hospital, Karolinska Institutet and Stockholm county council, Linköping University and University Hospital, Lund University and Skåne University Hospital, Umeå University and University Hospital, Uppsala University and University Hospital. Funding was also received from the Swedish state under the agreement between the Swedish government and the county councils, the ALF-agreement (ALFGBG-718851).

**Disclosures:** The authors report no disclosures in relation to the presented research.



## References

1. Arnett DK, Blumenthal RS, Albert MA, Buroker AB, Goldberger ZD, Hahn EJ, Himmelfarb CD, Khera A, Lloyd-Jones D, McEvoy JW, et al. 2019 ACC/AHA Guideline on the Primary Prevention of Cardiovascular Disease: A Report of the American College of Cardiology/American Heart Association Task Force on Clinical Practice Guidelines. *Circulation*. 2019;140:e596-e646. doi: 10.1161/CIR.0000000000000678
2. Orringer CE, Blaha MJ, Blankstein R, Budoff MJ, Goldberg RB, Gill EA, Maki KC, Mehta L, Jacobson TA. The National Lipid Association scientific statement on coronary artery calcium scoring to guide preventive strategies for ASCVD risk reduction. *J Clin Lipidol*. 2021;15:33-60. doi: 10.1016/j.jacl.2020.12.005
3. Gaine SP, Blumenthal RS, Sharma G. Coronary Artery Calcium Score as a Graded Decision Tool. *JACC: Advances*. 2023;2. doi: 10.1016/j.jacadv.2023.100664
4. Fuchs A, Kuhl JT, Sigvardsen PE, Afzal S, Knudsen AD, Moller MB, de Knecht MC, Sogaard MH, Nordestgaard BG, Kober LV, et al. Subclinical Coronary Atherosclerosis and Risk for Myocardial Infarction in a Danish Cohort : A Prospective Observational Cohort Study. *Annals of internal medicine*. 2023;176:433-442. doi: 10.7326/M22-3027
5. Garcia-Ortiz L, Barreiro-Perez M, Merchan-Gomez S, Ignacio Recio-Rodriguez J, Sanchez-Aguadero N, Alonso-Dominguez R, Lugones-Sanchez C, Rodriguez-Sanchez E, Sanchez PL, Gomez-Marcos MA, et al. Prevalence of coronary atherosclerosis and reclassification of cardiovascular risk in Spanish population by coronary computed tomography angiography: EVA study. *Eur J Clin Invest*. 2020;50:e13272. doi: 10.1111/eci.13272
6. Vilades-Medel D, Degano IR, Subirana I, Descalzo M, Padilla M, Mundet X, Carreras Costa F, Alomar Serrallach X, Camps A, Elosua R, et al. Usefulness of Cardiac Computed Tomography in Coronary Risk Prediction: A Five-Year Follow-Up of the SPICA Study (Secure Prevention with Imaging of the Coronary Arteries). *J Clin Med*. 2022;11. doi: 10.3390/jcm11030533
7. Bittencourt MS, Hulten E, Ghoshhajra B, O'Leary D, Christman MP, Montana P, Truong QA, Steigner M, Murthy VL, Rybicki FJ, et al. Prognostic value of nonobstructive and obstructive coronary artery disease detected by coronary computed tomography angiography to identify cardiovascular events. *Circulation Cardiovascular imaging*. 2014;7:282-291. doi: 10.1161/CIRCIMAGING.113.001047
8. Ayoub C, Erthal F, Abdelsalam MA, Murad MH, Wang Z, Erwin PJ, Hillis GS, Kritharides L, Chow BJW. Prognostic value of segment involvement score compared to other measures of coronary atherosclerosis by computed tomography: A systematic review and meta-analysis. *J Cardiovasc Comput Tomogr*. 2017;11:258-267. doi: 10.1016/j.jcct.2017.05.001
9. Hadamitzky M, Achenbach S, Al-Mallah M, Berman D, Budoff M, Cademartiri F, Callister T, Chang HJ, Cheng V, Chinnaiyan K, et al. Optimized prognostic score for coronary computed tomographic angiography: results from the CONFIRM registry (COronary CT Angiography EvaluationN For Clinical Outcomes: An InteRnational Multicenter Registry). *J Am Coll Cardiol*. 2013;62:468-476. doi: 10.1016/j.jacc.2013.04.064
10. Scot-Heart-Investigators, Newby DE, Adamson PD, Berry C, Boon NA, Dweck MR, Flather M, Forbes J, Hunter A, Lewis S, et al. Coronary CT Angiography and 5-Year Risk of Myocardial Infarction. *N Engl J Med*. 2018;379:924-933. doi: 10.1056/NEJMoa1805971

11. Duval S, Van't Hof JR, Steffen LM, Luepker RV. Estimation of Cardiovascular Risk from Self-Reported Knowledge of Risk Factors: Insights from the Minnesota Heart Survey. *Clin Epidemiol*. 2020;12:41-49. doi: 10.2147/CLEP.S219708
12. Mansoor H, Jo A, Beau De Rochars VM, Pepine CJ, Mainous AG, 3rd. Novel Self-Report Tool for Cardiovascular Risk Assessment. *J Am Heart Assoc*. 2019;8:e014123. doi: 10.1161/JAHA.119.014123
13. Bergstrom G, Persson M, Adiels M, Bjornson E, Bonander C, Ahlstrom H, Alfredsson J, Angeras O, Berglund G, Blomberg A, et al. Prevalence of Subclinical Coronary Artery Atherosclerosis in the General Population. *Circulation*. 2021;144:916-929. doi: 10.1161/CIRCULATIONAHA.121.055340
14. Bergstrom G, Berglund G, Blomberg A, Brandberg J, Engstrom G, Engvall J, Eriksson M, de Faire U, Flinck A, Hansson MG, et al. The Swedish CARDioPulmonary BioImage Study: objectives and design. *J Intern Med*. 2015;278:645-659. doi: 10.1111/joim.12384
15. Cury RC, Leipsic J, Abbara S, Achenbach S, Berman D, Bittencourt M, Budoff M, Chinnaiyan K, Choi AD, Ghoshhajra B, et al. CAD-RADS 2.0 - 2022 Coronary Artery Disease-Reporting and Data System: An Expert Consensus Document of the Society of Cardiovascular Computed Tomography (SCCT), the American College of Cardiology (ACC), the American College of Radiology (ACR), and the North America Society of Cardiovascular Imaging (NASCI). *JACC Cardiovasc Imaging*. 2022;15:1974-2001. doi: 10.1016/j.jcmg.2022.07.002
16. Golub IS, Termeie OG, Kristo S, Schroeder LP, Lakshmanan S, Shafter AM, Hussein L, Verghese D, Aldana-Bitar J, Manubolu VS, et al. Major Global Coronary Artery Calcium Guidelines. *JACC Cardiovasc Imaging*. 2023;16:98-117. doi: 10.1016/j.jcmg.2022.06.018
17. Ferencik M, Schlett CL, Bamberg F, Truong QA, Nichols JH, Pena AJ, Shapiro MD, Rogers IS, Seneviratne S, Parry BA, et al. Comparison of traditional cardiovascular risk models and coronary atherosclerotic plaque as detected by computed tomography for prediction of acute coronary syndrome in patients with acute chest pain. *Acad Emerg Med*. 2012;19:934-942. doi: 10.1111/j.1553-2712.2012.01417.x
18. Nance JW, Jr., Schlett CL, Schoepf UJ, Oberoi S, Leisy HB, Barraza JM, Jr., Headden GF, Nikolaou K, Bamberg F. Incremental prognostic value of different components of coronary atherosclerotic plaque at cardiac CT angiography beyond coronary calcification in patients with acute chest pain. *Radiology*. 2012;264:679-690. doi: 10.1148/radiol.12112350
19. Plank F, Friedrich G, Dichtl W, Klauser A, Jaschke W, Franz WM, Feuchtner G. The diagnostic and prognostic value of coronary CT angiography in asymptomatic high-risk patients: a cohort study. *Open Heart*. 2014;1:e000096. doi: 10.1136/openhrt-2014-000096
20. Björk J, Strömberg U, Rosengren A, Toren K, Fagerberg B, Grimby-Ekman A, Bergstrom G. Predicting participation in the population-based Swedish cardiopulmonary bio-image study (SCAPIS) using register data. *Scand J Public Health*. 2017;45:45-49. doi: 10.1177/1403494817702326
21. Agatston AS, Janowitz WR, Hildner FJ, Zusmer NR, Viamonte M, Jr., Detrano R. Quantification of coronary artery calcium using ultrafast computed tomography. *J Am Coll Cardiol*. 1990;15:827-832. doi: 10.1016/0735-1097(90)90282-t
22. Collins GS, Reitsma JB, Altman DG, Moons KG. Transparent reporting of a multivariable prediction model for individual prognosis or diagnosis (TRIPOD): the TRIPOD statement. *BMJ*. 2015;350:g7594. doi: 10.1136/bmj.g7594

23. DeLong ER, DeLong DM, Clarke-Pearson DL. Comparing the areas under two or more correlated receiver operating characteristic curves: a nonparametric approach. *Biometrics*. 1988;44:837-845.
24. Vickers AJ, van Calster B, Steyerberg EW. A simple, step-by-step guide to interpreting decision curve analysis. *Diagn Progn Res*. 2019;3:18. doi: 10.1186/s41512-019-0064-7
25. Larsson SC, Burgess S. Causal role of high body mass index in multiple chronic diseases: a systematic review and meta-analysis of Mendelian randomization studies. *BMC Med*. 2021;19:320. doi: 10.1186/s12916-021-02188-x
26. Park J, Lee ES, Lee DY, Kim J, Park SE, Park CY, Lee WY, Oh KW, Park SW, Rhee EJ. Waist Circumference as a Marker of Obesity Is More Predictive of Coronary Artery Calcification than Body Mass Index in Apparently Healthy Korean Adults: The Kangbuk Samsung Health Study. *Endocrinol Metab (Seoul)*. 2016;31:559-566. doi: 10.3803/EnM.2016.31.4.559
27. Bergstrom G, Rosengren A, Bacsovcics Broolin E, Brandberg J, Cederlund K, Engstrom G, Engvall JE, Eriksson MJ, Goncalves I, Hagstrom E, et al. Body weight at age 20 and in midlife is more important than weight gain for coronary atherosclerosis: Results from SCAPIS. *Atherosclerosis*. 2023. doi: 10.1016/j.atherosclerosis.2023.01.024
28. Hippisley-Cox J, Coupland C, Vinogradova Y, Robson J, Minhas R, Sheikh A, Brindle P. Predicting cardiovascular risk in England and Wales: prospective derivation and validation of QRISK2. *BMJ*. 2008;336:1475-1482. doi: 10.1136/bmj.39609.449676.25
29. Mureddu GF, Brandimarte F, Faggiano P, Rigo F, Nixdorff U. Between risk charts and imaging: how should we stratify cardiovascular risk in clinical practice? *Eur Heart J Cardiovasc Imaging*. 2013;14:401-416. doi: 10.1093/ehjci/jes297
30. Ties D, van der Ende YM, Pundziute G, van der Schouw YT, Bots ML, Xia C, van Ooijen PMA, Pelgrim GJ, Vliegenthart R, van der Harst P. Pre-screening to guide coronary artery calcium scoring for early identification of high-risk individuals in the general population. *Eur Heart J Cardiovasc Imaging*. 2022;24:27-35. doi: 10.1093/ehjci/jeac137
31. Bonander C, Nilsson A, Bjork J, Bergstrom GML, Stromberg U. Participation weighting based on sociodemographic register data improved external validity in a population-based cohort study. *J Clin Epidemiol*. 2019;108:54-63. doi: 10.1016/j.jclinepi.2018.12.011
32. Hollands GJ, Usher-Smith JA, Hasan R, Alexander F, Clarke N, Griffin SJ. Visualising health risks with medical imaging for changing recipients' health behaviours and risk factors: Systematic review with meta-analysis. *PLoS Med*. 2022;19:e1003920. doi: 10.1371/journal.pmed.1003920

## Figure legends

### Figure 1:

*Receiver operating characteristic (ROC) curve for the self-report tool's assessment of  $SIS \geq 4$  in the internal and external validation group compared to PCE (Panel A, self-report tool vs. PCE,  $p < 0.001$ ,  $p < 0.001$  for internal and external validation respectively). Variable importance of the self-report tool (Panel B). ROC curve for the clinical tool's assessment of  $SIS \geq 4$  compared to PCE (Panel C, clinical tool vs. PCE,  $p < 0.001$ ,  $p < 0.001$  for internal and external validation respectively). Variable importance of the clinical tool (Panel D). AUC, area under the curve. The DeLong test was used for statistical comparison.*

### Figure 2:

*Receiver operating characteristic curves for the self-report tool and the clinical tool assessing  $SIS \geq 4$  vs. PCE, stratified by age. Age 50-54.9 (NS, NS for self-report and clinical tool respectively), 55-59.9 ( $p < 0.05$ ,  $p < 0.001$  for self-report and clinical tool respectively), 60-65.9 ( $p < 0.001$ ,  $p < 0.001$  for self-report and clinical tool respectively). The DeLong test was used for statistical comparison. NS; non-significant.*

### Figure 3:

*Receiver operating characteristic curves for the self-report tool and the clinical tool assessing  $SIS \geq 4$  vs. PCE, stratified by sex. Female; Self-report tool vs. PCE ( $p < 0.001$ ), Clinical tool vs. PCE ( $p < 0.001$ ). Male; Self-report tool vs. PCE ( $p < 0.001$ ), Clinical tool vs. PCE (NS). The DeLong test was used for statistical comparison. NS; non-significant.*

**Table 1:** Clinical characteristics of individuals (n=25,182) with high-quality coronary computed tomography angiography, without known coronary heart disease, stratified by sex and segment involvement score (SIS)  $\geq 4$ .

|                                                              | Total         | Female        |             | Male        |              |
|--------------------------------------------------------------|---------------|---------------|-------------|-------------|--------------|
|                                                              | All SIS       | SIS < 4       | SIS ≥ 4     | SIS < 4     | SIS ≥ 4      |
| N                                                            | 25,182        | 12,094        | 644         | 10,085      | 2359         |
| <b>Sociodemographics</b>                                     |               |               |             |             |              |
| Age, Years                                                   | 57.4 ± 4.3    | 57.31 ± 4.3   | 59.62 ± 3.9 | 56.94 ± 4.3 | 59.26 ± 4.1  |
| Education, University degree, n (%)                          | 11,300 (46.0) | 6010 (49.7)   | 242 (37.6)  | 4183 (41.5) | 865 (36.7)   |
| Born in Sweden - yes, n (%)                                  | 20,893 (83.0) | 10,030 (82.9) | 533 (82.8)  | 8455 (83.8) | 1875 (36.7)  |
| Can raise 20 000 SEK <sup>†</sup> within a week - yes, n (%) | 22,515 (89.4) | 10,748 (88.9) | 551 (85.6)  | 9152 (90.7) | 2064 (87.5)  |
| <b>Anthropometry</b>                                         |               |               |             |             |              |
| Weight at age 20, kg                                         | 66.5 ± 11.3   | 58.0 ± 7.8    | 58.8 ± 9.0  | 73.0 ± 8.9  | 73.6 ± 9.5   |
| Weight, kg                                                   | 80.1 ± 15.5   | 72.2 ± 13.0   | 74.6 ± 14.6 | 87.6 ± 13.3 | 89.9 ± 14.5  |
| Height, cm                                                   | 173 ± 9.6     | 166 ± 6.4     | 165 ± 6.1   | 180 ± 6.9   | 179 ± 7.0    |
| Waist circumference, cm                                      | 94.0 ± 12.6   | 88.7 ± 11.9   | 93.1 ± 13.2 | 98.6 ± 10.7 | 101.9 ± 11.4 |
| Hip circumference, cm                                        | 102 ± 8.5     | 103 ± 9.7     | 104 ± 10.8  | 102 ± 6.9   | 102 ± 7.4    |
| <b>Smoking status</b>                                        |               |               |             |             |              |
| Current smoker, n (%)                                        | 3215 (12.8)   | 1504 (12.4)   | 172 (26.7)  | 1142 (11.3) | 397 (16.8)   |
| Mean pack-years, Years                                       | 7.2 ± 11.7    | 6.8 ± 10.6    | 15.9 ± 15.6 | 6.4 ± 11.5  | 10.5 ± 14.7  |
| Duration of smoking, Years                                   | 11.6 ± 15.2   | 11.8 ± 15.3   | 22.9 ± 17.9 | 9.8 ± 14.6  | 15.1 ± 17.0  |
| <b>Treatment</b>                                             |               |               |             |             |              |
| Cholesterol-lowering medication, n (%)                       | 1624 (6.4)    | 534 (4.4)     | 117 (18.2)  | 578 (5.7)   | 395 (16.7)   |
| Antihypertensive medication, n (%)                           | 4437 (17.6)   | 1852 (15.3)   | 233 (36.2)  | 1554 (15.4) | 798 (33.8)   |
| Diabetes medication, n (%)                                   | 717 (2.8)     | 198 (1.6)     | 49 (7.6)    | 273 (2.7)   | 197 (8.4)    |
| <b>Diagnosis</b>                                             |               |               |             |             |              |
| Diagnosed hypertension, n (%)                                | 2056 (8.2)    | 807 (6.7)     | 115 (17.9)  | 707 (7.0)   | 427 (18.1)   |
| Diabetes duration, age (years)                               | 0.3 (2.6)     | 0.2 (2.3)     | 1.2 (6.0)   | 0.3 (2.1)   | 0.9 (4.2)    |
| <b>Blood pressure, mmHg</b>                                  |               |               |             |             |              |
| Systolic, mmHg                                               | 126 ± 17      | 122 ± 18      | 130 ± 18    | 128 ± 15    | 133 ± 16     |
| Diastolic, mmHg                                              | 78 ± 11       | 77 ± 11       | 79 ± 11     | 78 ± 10     | 80 ± 10      |
| <b>Clinical chemistry</b>                                    |               |               |             |             |              |
| Total cholesterol, mmol/L                                    | 5.5 ± 1.0     | 5.7 ± 1.0     | 5.8 ± 1.2   | 5.4 ± 1.0   | 5.5 ± 1.1    |
| HDL cholesterol, mmol/L                                      | 1.6 ± 0.5     | 1.9 ± 0.5     | 1.7 ± 0.5   | 1.4 ± 0.4   | 1.4 ± 0.4    |
| LDL, calculated, cholesterol, mmol/L                         | 3.5 ± 0.9     | 3.4 ± 0.9     | 3.7 ± 1.1   | 3.5 ± 0.9   | 3.6 ± 1.1    |
| Triglycerides, mmol/L                                        | 1.2 ± 0.8     | 1.1 ± 0.6     | 1.4 ± 0.8   | 1.3 ± 0.9   | 1.5 ± 0.9    |
| Glucose, mmol/mL                                             | 5.7 ± 1.0     | 5.5 ± 0.8     | 5.9 ± 1.4   | 5.8 ± 1.0   | 6.2 ± 1.5    |
| HbA1c, mmol/mL                                               | 36.3 ± 5.9    | 35.9 ± 4.9    | 38.6 ± 8.0  | 36.0 ± 5.7  | 38.4 ± 8.8   |
| High-sensitive C- reactive protein, mg/L                     | 2.1 ± 3.9     | 2.1 ± 3.6     | 2.7 ± 5.2   | 1.9 ± 3.7   | 2.4 ± 5.4    |
| <b>Risk score</b>                                            |               |               |             |             |              |
| Pooled cohort equation, %                                    | 6.2 ± 5.5     | 3.2 ± 2.7     | 5.9 ± 4.3   | 8.4 ± 5.3   | 12.5 ± 6.9   |
| <b>Heredity</b>                                              |               |               |             |             |              |
| Family history of premature myocardial infarction, n (%)     | 1619 (6.4)    | 821 (6.8)     | 79 (12.3)   | 515 (5.1)   | 204 (8.6)    |
| Family history of premature stroke, n (%)                    | 1468 (5.8)    | 780 (6.4)     | 56 (8.7)    | 469 (4.7)   | 163 (6.9)    |

\*SEK: Swedish Krona, LDL: low-density lipoprotein, HDL: high-density lipoprotein, HbA1c: glycated hemoglobin

**Table 2:** Factors in the self-report, clinical tool and the Pooled Cohort Equation (PCE) and their measurement scales

| Category            | Factor                              | Self-Report Tool (Scale) | Clinical Tool (Scale) | PCE (Scale) |
|---------------------|-------------------------------------|--------------------------|-----------------------|-------------|
| Demographics        | Sex                                 | Binary                   | Binary                | Binary      |
|                     | Age                                 | Continuous               | Continuous            | Continuous  |
|                     | Race                                | N/A*                     | N/A                   | Categorical |
| Anthropometry       | Body weight                         | Continuous               | Continuous            | N/A         |
|                     | Body weight at age 20               | Continuous               | Continuous            | N/A         |
|                     | Body height                         | Continuous               | Continuous            | N/A         |
|                     | Waist circumference                 | Continuous               | Continuous            | N/A         |
|                     | Hip circumference                   | Continuous               | Continuous            | N/A         |
| Smoking status      | Cigarette pack-years                | Continuous               | Continuous            | N/A         |
|                     | Smoking duration                    | Continuous               | Continuous            | N/A         |
|                     | Currently smoking                   | N/A                      | N/A                   | Binary      |
| Health condition    | Lipid-lowering medication           | Binary                   | Binary                | Binary      |
|                     | Antihypertensive medication         | Binary                   | Binary                | Binary      |
|                     | Diagnosed hypertension              | Binary                   | Binary                | Binary      |
|                     | Diabetes duration                   | Continuous               | Continuous            | Binary      |
| Blood tests         | Diagnosed diabetes                  | N/A                      | N/A                   | Binary      |
|                     | HbA1c                               | N/A                      | Continuous            | Continuous  |
|                     | Total cholesterol                   | N/A                      | Continuous            | Continuous  |
|                     | Plasma glucose                      | N/A                      | Continuous            | N/A         |
|                     | Creatinine                          | N/A                      | Continuous            | N/A         |
|                     | Plasma triglycerides                | N/A                      | Continuous            | N/A         |
|                     | HDL-cholesterol                     | N/A                      | Continuous            | Continuous  |
| Clinical assessment | Systolic Blood Pressure             | N/A                      | Continuous            | Continuous  |
| Family history      | Hereditiy for Myocardial Infarction | Binary                   | Binary                | N/A         |

N/A, Not Applicable

**Table 3:** Population-ordered distribution for the self-report tool in identifying Segment Involvement Score (SIS)  $\geq 4$ . The first decile presents individuals at the highest mean absolute risk. Red - High mean absolute risk (average risk 27.1%); Yellow - Moderate mean absolute risk (average risk 9.3%); Green - Low mean absolute risk (average risk 2.4%).

| Decile of risk | Cumulative % of population | Mean absolute risk for SIS $\geq 4$ (%) | Cumulative number of CCTAs per finding | Cumulative % of all positives | Age (years)* | Male (%) | SIS (number of segments)* | CACS (Agatston Score)* | BMI (kg/m <sup>2</sup> )* |
|----------------|----------------------------|-----------------------------------------|----------------------------------------|-------------------------------|--------------|----------|---------------------------|------------------------|---------------------------|
| 1              | 10%                        | 39.5                                    | 2.5                                    | 31.4                          | 61.9         | 92.3     | 3.1                       | 240.2                  | 28.6                      |
| 2              | 20%                        | 23.0                                    | 3.2                                    | 49.7                          | 61.0         | 91.1     | 2.0                       | 92.1                   | 27.7                      |
| 3              | 30%                        | 18.7                                    | 3.7                                    | 64.6                          | 59.0         | 81.1     | 1.8                       | 87.7                   | 27.7                      |
| 4              | 40%                        | 11.4                                    | 4.3                                    | 73.7                          | 57.4         | 70.6     | 1.3                       | 55.2                   | 27.9                      |
| 5              | 50%                        | 12.4                                    | 4.8                                    | 83.6                          | 57.3         | 55.7     | 1.2                       | 40.6                   | 27.0                      |
| 6              | 60%                        | 7.1                                     | 5.3                                    | 89.3                          | 57.4         | 43.5     | 0.8                       | 28.3                   | 26.8                      |
| 7              | 70%                        | 6.2                                     | 5.9                                    | 94.2                          | 57.1         | 38.1     | 0.7                       | 20.9                   | 25.8                      |
| 8              | 80%                        | 3.7                                     | 6.6                                    | 97.1                          | 56.2         | 21.9     | 0.6                       | 15.5                   | 26.0                      |
| 9              | 90%                        | 2.4                                     | 7.2                                    | 99.0                          | 54.3         | 6.8      | 0.4                       | 12.0                   | 25.9                      |
| 10             | 100%                       | 1.3                                     | 8.0                                    | 100.0                         | 52.5         | 0.8      | 0.2                       | 3.9                    | 24.8                      |

SIS, Segment Involvement Score; CCTA, Coronary Computed Tomography Angiography; CACS, Coronary Artery Calcium Score; BMI, Body Mass Index. \* mean.



**Figure 1:**

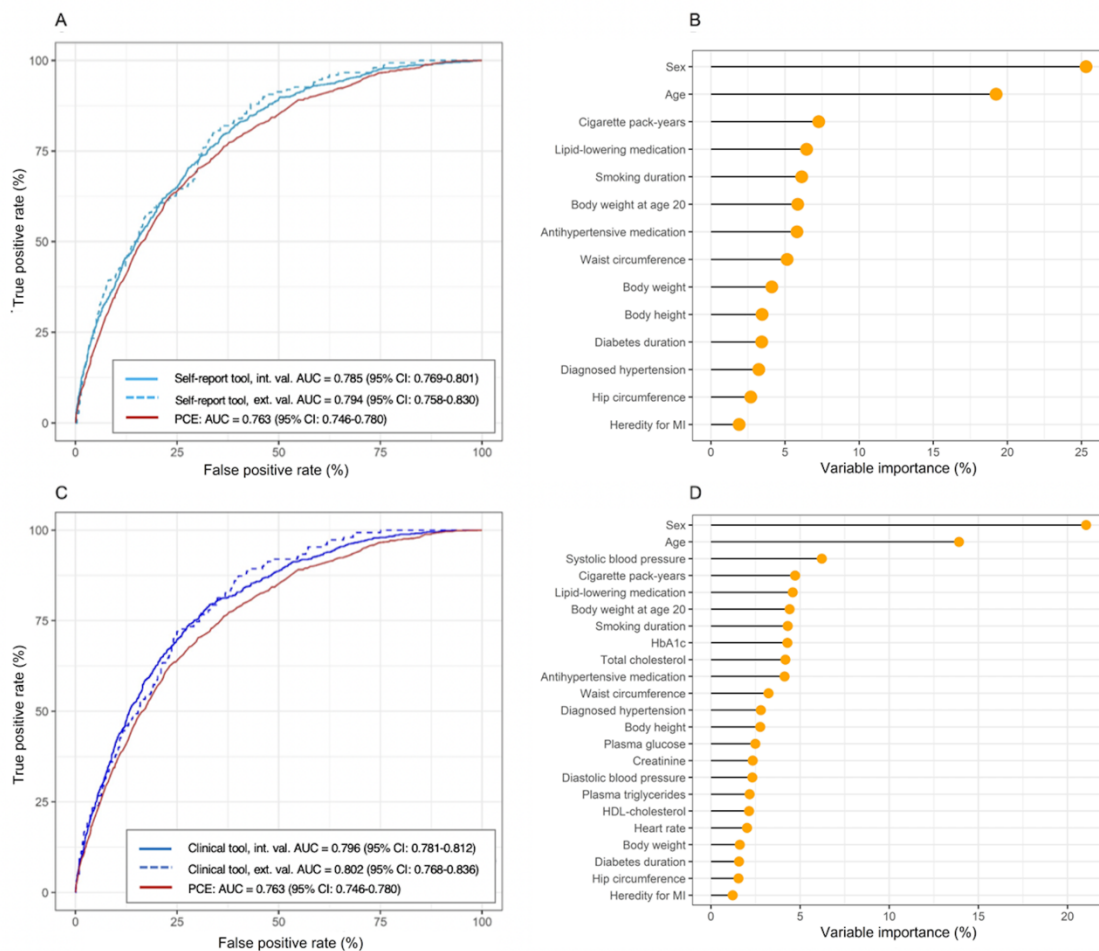

**Figure 2:**

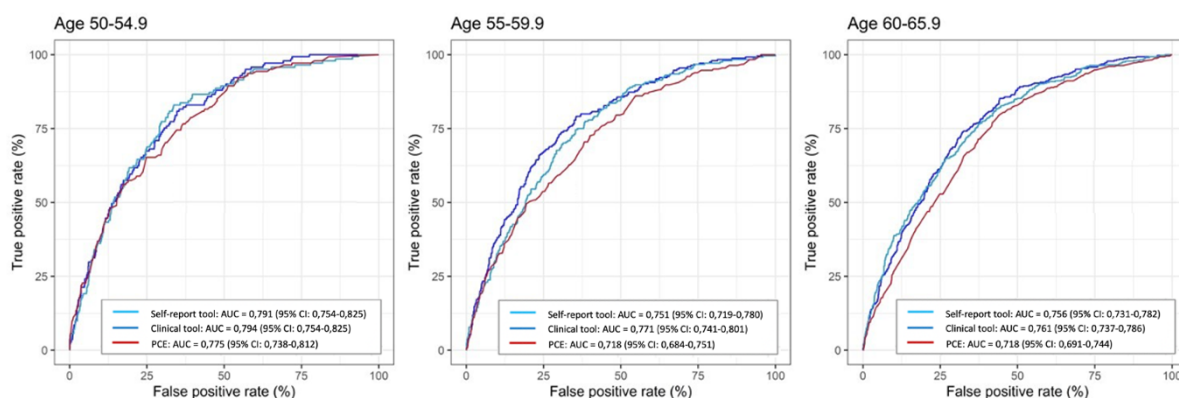

**Figure 3**

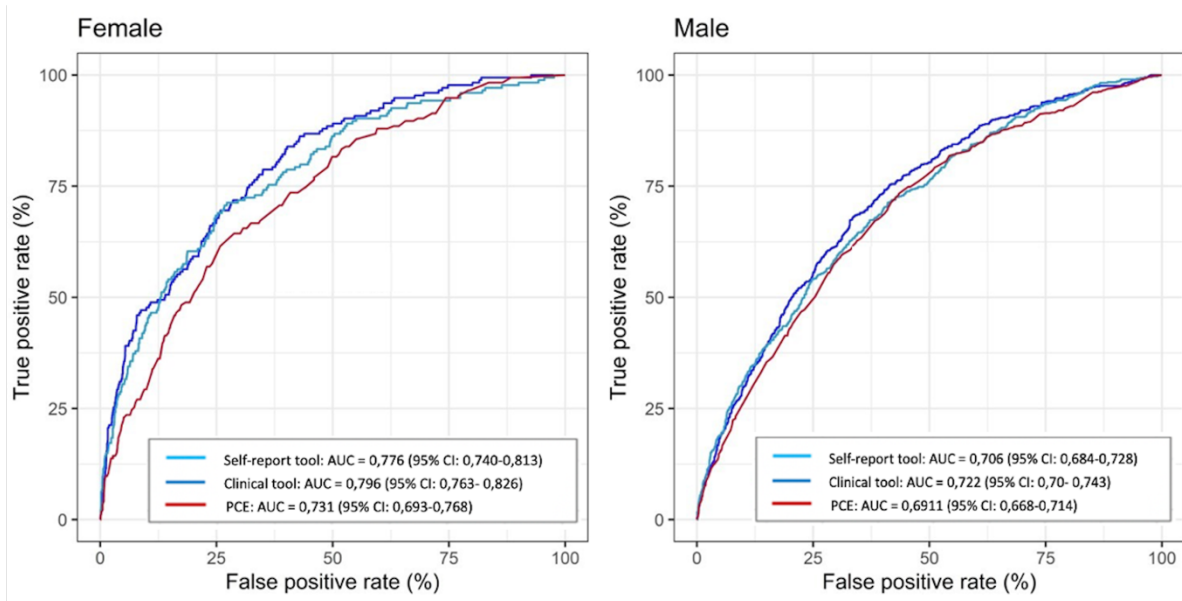

Source: https://medrxiv.org/content/10.1101/2024.01.24.24301753v1.full.pdf
